# Supplementary material for: The Necessity of Implant Removal after Fixation of Thoracolumbar Burst Fractures—A Systematic Review
Source: MDPI journal article supplement (doi:10.3390/jcm12062213), 2023-03-13
Supplement: s1 [file s1]

**Table S3: The reported clinical outcomes in case reports and case series**

| Study                                     | Instrumentation                                                                     | Time to implant removal   | Pre-removal                                                                             | Segmental Motion Angle | Post-removal Pain                                    | Post-removal Kyphosis Deformity                                                           | Removal Complications                                                          | Post-removal Follow-up  |
|-------------------------------------------|-------------------------------------------------------------------------------------|---------------------------|-----------------------------------------------------------------------------------------|------------------------|------------------------------------------------------|-------------------------------------------------------------------------------------------|--------------------------------------------------------------------------------|-------------------------|
| Vanichkachorn et al. <sup>[30]</sup> 1997 | Short segment fixation with fusion                                                  | 18 months                 | Symptomatic (pedicle screw was broken)                                                  | ——                     | ——                                                   | ——                                                                                        | Inadvertent screw migration into the retroperitoneal space                     | ——                      |
| Waelchli et al. <sup>[31]</sup> 2002      | Short segment fixation with fusion                                                  | 18 months                 | Symptomatic (local discomfort presumably due to mechanical irritation)                  | ——                     | Persistent severe back pain                          | Kyphosis deformity of 28° on POD 3                                                        | Acute T12 compression fracture                                                 | ——                      |
|                                           | Short segment fixation with fusion                                                  | 12 months                 | Symptomatic (mild occasional back pain due to putative local irritation of the implant) | ——                     | Increased back pain than preoperative                | Kyphosis deformity of 22°                                                                 | Acute L1 compression fracture                                                  | ——                      |
| Cappucciet al. <sup>[32]</sup> 2015       | Short segment fixation without fusion                                               | 9 months                  | Symptomatic (local pain, presumably due to mechanical irritation)                       | ——                     | Completely pain-free 1 year later                    | No further progression of kyphosis deformity on POD 2                                     | Acute fracture of the superior plate on L1                                     | 12 months               |
| Takeda et al. <sup>[33]</sup> 2022        | Short segment fixation with fusion and converted to long segment fixation on POD 22 | 21 months                 | Asymptomatic                                                                            | ——                     | ——                                                   | Obvious loss of lordosis was observed, and local kyphosis angle increased from 28° to 40° | ——                                                                             | 27 months               |
| <hr/>                                     |                                                                                     |                           |                                                                                         |                        |                                                      |                                                                                           |                                                                                |                         |
| Kim et al. <sup>[34]</sup> 2008           | Long segment fixation with fusion                                                   | 15 (range 11-24) months   | Symptomatic (recurrent or persistent back pain)                                         | ——                     | Significant pain relief (pain score from 6.4 to 2.6) | 5.9° of sagittal correction loss                                                          | No major complications                                                         | 18 (range 12-25) months |
| Wang et al. <sup>[35]</sup> 2008          | Short segment fixation with fusion                                                  | 12.5 (range 10–42) months | Asymptomatic (only 2 of 27 patients occasionally need analgesic)                        | ——                     | ——                                                   | 11.5°±5.4° (2°~22°) of sagittal correction loss                                           | ——                                                                             | 2.7 (range 2-4.5) years |
| Toyone et al. <sup>[36]</sup> 2013        | Short segment fixation without fusion                                               | 12 months                 | Asymptomatic (no failures of posterior instrumentation)                                 | ——                     | ——                                                   | ——                                                                                        | Three reported occasional minimal pain (score 2), and 1 reported moderate pain | >10 years               |
| Axelsson et al. <sup>[37]</sup>           | 3 Short/4 Long                                                                      | 18 months                 | Symptomatic (implant-related                                                            | Improved               | 1 patient residual pain,                             | 1 patient progressive                                                                     | 1 patient the threaded parts                                                   | 3 months                |

|      |                                    |            |                                         |                                                                                                 |                            |
|------|------------------------------------|------------|-----------------------------------------|-------------------------------------------------------------------------------------------------|----------------------------|
| 2016 | segment<br>fixation with<br>fusion | back pain) | 1 patient<br>unchanged or<br>worse pain | kyphosis<br>deformity 35°<br>and 20°scoliosis;<br>2 patients had a<br>minor kyphosis<br>of <20° | of the screws<br>were left |
|------|------------------------------------|------------|-----------------------------------------|-------------------------------------------------------------------------------------------------|----------------------------|

---

Abbreviations: POD, Postoperative day; —, Not Reported.
