# Supplementary material for: The Necessity of Implant Removal after Fixation of Thoracolumbar Burst Fractures—A Systematic Review
Source: MDPI journal article supplement (doi:10.3390/jcm12062213), 2023-03-13
Supplement: s1 [file s1]

**Table S1: Search strategies for primary databases****PubMed**

| <b>Search number</b> | <b>Query</b>                                         | <b>Results</b> |
|----------------------|------------------------------------------------------|----------------|
| #1                   | "Spinal Fractures"[Mesh]                             | 17,156         |
| #2                   | Spinal fracture[Title/Abstract]                      | 851            |
| #3                   | Spinal fractures[Title/Abstract]                     | 1,547          |
| #4                   | Spinal burst fracture[Title/Abstract]                | 15             |
| #5                   | Spinal burst fractures[Title/Abstract]               | 22             |
| #6                   | Thoracolumbar fracture[Title/Abstract]               | 499            |
| #7                   | Thoracolumbar fractures[Title/Abstract]              | 929            |
| #8                   | Thoracolumbar burst fractures[Title/Abstract]        | 506            |
| #9                   | Thoracolumbar burst fracture[Title/Abstract]         | 272            |
| #10                  | #1 OR #2 OR #3 OR #4 OR #5 OR #6 OR #7 OR #8 OR #9   | 18,746         |
| #11                  | "Thoracic Vertebrae"[Mesh]                           | 22,852         |
| #12                  | "Lumbar Vertebrae"[Mesh]                             | 59,528         |
| #13                  | "Vertebrae"[Mesh]                                    | 25,248,984     |
| #14                  | Thoracic vertebrae[Title/Abstract]                   | 1,866          |
| #15                  | Lumbar vertebrae[Title/Abstract]                     | 4,993          |
| #16                  | Thoracic[Title/Abstract]                             | 166,622        |
| #17                  | Lumbar[Title/Abstract]                               | 123,534        |
| #18                  | Thoracolumbar[Title/Abstract]                        | 11,756         |
| #19                  | #11 OR #12 OR #13 OR #14 OR #15 OR #16 OR #17 OR #18 | 301,868        |
| #20                  | Fracture[Title/Abstract]                             | 206,758        |
| #21                  | Fractures[Title/Abstract]                            | 182,293        |
| #22                  | Fracture*[Title/Abstract]                            | 300,860        |
| #23                  | Burst Fracture[Title/Abstract]                       | 1,048          |
| #24                  | Burst Fractures[Title/Abstract]                      | 1,176          |
| #25                  | Burst Fracture*[Title/Abstract]                      | 1,763          |
| #26                  | #20 OR #21 OR #22 OR #23 OR #24 OR #25               | 300,860        |
| #27                  | #19 AND #26                                          | 20,479         |
| #28                  | #10 OR #27                                           | 31,695         |
| #29                  | "Pedicule Screws"[Mesh]                              | 2,744          |
| #30                  | Instrument[Title/Abstract]                           | 138,828        |
| #31                  | Pedicle screw[Title/Abstract]                        | 6,741          |
| #32                  | Pedicle screws[Title/Abstract]                       | 4,211          |
| #33                  | Instrumentation[Title/Abstract]                      | 41,561         |
| #34                  | Instrument*[Title/Abstract]                          | 338,944        |

|     |                                                                                                      |         |
|-----|------------------------------------------------------------------------------------------------------|---------|
| #35 | Implant[Title/Abstract]                                                                              | 147,322 |
| #36 | Screw*[Title/Abstract]                                                                               | 52,573  |
| #37 | Screw-rod[Title/Abstract]                                                                            | 644     |
| #38 | Rod[Title/Abstract]                                                                                  | 52,523  |
| #39 | Metalware[Title/Abstract]                                                                            | 51      |
| #40 | Hardware[Title/Abstract]                                                                             | 28,709  |
| #41 | Fixation[Title/Abstract]                                                                             | 168,302 |
| #42 | internal-fixation[Title/Abstract]                                                                    | 21,805  |
| #43 | #29 OR #30 OR #31 OR #32 OR #33 OR #34 OR #35<br>OR #36 OR #37 OR #38 OR #39 OR #40 OR #41 OR<br>#42 | 722,292 |
| #44 | remov*[Title/Abstract]                                                                               | 726,845 |
| #45 | remove[Title/Abstract]                                                                               | 90,718  |
| #46 | removed[Title/Abstract]                                                                              | 239,119 |
| #47 | Removal[Title/Abstract]                                                                              | 402,891 |
| #48 | #44 OR #45 OR #46 OR #47                                                                             | 726,845 |
| #49 | #28 AND #43 AND #47                                                                                  | 648     |

## Embase

| Search number | Query                                                 | Results |
|---------------|-------------------------------------------------------|---------|
| #1            | 'spine fracture'/exp                                  | 43744   |
| #2            | 'spine fracture':ta,ab,kw                             | 1709    |
| #3            | 'spine fractures':ta,ab,kw                            | 2506    |
| #4            | 'spinal burst fracture':ta,ab,kw                      | 14      |
| #5            | 'spinal burst fractures':ta,ab,kw                     | 20      |
| #6            | 'thoracolumbar fracture':ta,ab,kw                     | 662     |
| #7            | 'thoracolumbar fractures':ta,ab,kw                    | 1049    |
| #8            | 'thoracolumbar burst fractures':ta,ab,kw              | 528     |
| #9            | 'thoracolumbar burst fracture':ta,ab,kw               | 300     |
| #10           | #1 OR #2 OR #3 OR #4 OR #5 OR #6 OR #7 OR #8<br>OR #9 | 44835   |
| #11           | 'lumbar vertebra'/exp                                 | 25732   |
| #12           | 'thoracic vertebra'/exp                               | 3481    |
| #13           | 'lumbar vertebrae':ta,ab,kw                           | 6626    |
| #14           | 'lumbar':ta,ab,kw                                     | 160332  |
| #15           | 'thoracic vertebrae':ta,ab,kw                         | 2427    |
| #16           | 'thoracic':ta,ab,kw                                   | 222222  |
| #17           | 'thoracolumbar':ta,ab,kw                              | 14266   |
| #18           | #11 OR #12 OR #13 OR #14 OR #15 OR #16 OR             | 381565  |

|     |                                                                                                      |        |
|-----|------------------------------------------------------------------------------------------------------|--------|
|     | #17                                                                                                  |        |
| #19 | fracture:ta,ab,kw                                                                                    | 237573 |
| #20 | fractures:ta,ab,kw                                                                                   | 195085 |
| #21 | fracture*:ta,ab,kw                                                                                   | 326738 |
| #22 | 'burst fracture':ta,ab,kw                                                                            | 1206   |
| #23 | 'burst fractures':ta,ab,kw                                                                           | 1300   |
| #24 | 'burst fracture*':ta,ab,kw                                                                           | 1946   |
| #25 | #19 OR #20 OR #21 OR #22 OR #23 OR #24                                                               | 326738 |
| #26 | #18 AND #25                                                                                          | 28268  |
| #27 | #10 OR #26                                                                                           | 61168  |
| #28 | 'pedicle screw'/exp                                                                                  | 11419  |
| #29 | 'pedicle screw':ta,ab,kw                                                                             | 8444   |
| #30 | 'pedicle screws':ta,ab,kw                                                                            | 5390   |
| #31 | instrument:ta,ab,kw                                                                                  | 172611 |
| #32 | instrumentation:ta,ab,kw                                                                             | 49643  |
| #33 | instrument*:ta,ab,kw                                                                                 | 414715 |
| #34 | implant:ta,ab,kw                                                                                     | 173261 |
| #35 | screw*:ta,ab,kw                                                                                      | 58413  |
| #36 | 'screw rod':ta,ab,kw                                                                                 | 811    |
| #37 | rod:ta,ab,kw                                                                                         | 57149  |
| #38 | metalware:ta,ab,kw                                                                                   | 58     |
| #39 | hardware:ta,ab,kw                                                                                    | 33139  |
| #40 | fixation:ta,ab,kw                                                                                    | 176344 |
| #41 | 'internal fixation':ta,ab,kw                                                                         | 24153  |
| #42 | #28 OR #29 OR #30 OR #31 OR #32 OR #33 OR<br>#34 OR #35 OR #36 OR #37 OR #38 OR #39 OR<br>#40 OR #41 | 837872 |
| #43 | removal:ta,ab,kw                                                                                     | 475635 |
| #44 | removed:ta,ab,kw                                                                                     | 323247 |
| #45 | remove:ta,ab,kw                                                                                      | 115093 |
| #46 | remov*:ta,ab,kw                                                                                      | 899459 |
| #47 | #43 OR #44 OR #45 OR #46                                                                             | 899459 |
| #48 | #27 AND #42 AND #47                                                                                  | 1048   |

## The Cochrane Library

| Search number | Query                                                 | Results |
|---------------|-------------------------------------------------------|---------|
| #1            | MeSH descriptor: [Spinal Fractures] explode all trees | 789     |
| #2            | (Spinal fracture):ti,ab,kw                            | 2023    |

|     |                                                         |       |
|-----|---------------------------------------------------------|-------|
| #3  | (Spinal fractures):ti,ab,kw                             | 1692  |
| #4  | (Spinal burst fracture):ti,ab,kw                        | 70    |
| #5  | (Spinal burst fractures):ti,ab,kw                       | 73    |
| #6  | (Thoracolumbar fracture):ti,ab,kw                       | 336   |
| #7  | (Thoracolumbar fractures):ti,ab,kw                      | 306   |
| #8  | (Thoracolumbar burst fractures):ti,ab,kw                | 90    |
| #9  | (Thoracolumbar burst fracture):ti,ab,kw                 | 93    |
| #10 | #1 or #2 or #3 or #4 or #5 or #6 or #7 or #8 or #9      | 2648  |
| #11 | MeSH descriptor: [Lumbar Vertebrae] explode all trees   | 2853  |
| #12 | MeSH descriptor: [Thoracic Vertebrae] explode all trees | 513   |
| #13 | (Thoracic vertebrae):ti,ab,kw                           | 1081  |
| #14 | (Lumbar vertebrae):ti,ab,kw                             | 4123  |
| #15 | (Lumbar):ti,ab,kw                                       | 18710 |
| #16 | (Thoracic):ti,ab,kw                                     | 16710 |
| #17 | (Thoracolumbar):ti,ab,kw                                | 951   |
| #18 | #11 or #12 or #13 or #14 or #15 or #16 or #17           | 34596 |
| #19 | (Fracture):ti,ab,kw                                     | 20992 |
| #20 | (Fractures):ti,ab,kw                                    | 17438 |
| #21 | (Fracture*):ti,ab,kw                                    | 26872 |
| #22 | (Burst Fracture):ti,ab,kw                               | 123   |
| #23 | (Burst Fractures):ti,ab,kw                              | 114   |
| #24 | (Burst Fracture*):ti,ab,kw                              | 139   |
| #25 | #19 or #20 or #21 or #22 or #23 or #24                  | 26874 |
| #26 | #18 and #25                                             | 3069  |
| #27 | #10 or #26                                              | 4728  |
| #28 | MeSH descriptor: [Pedicule Screws] explode all trees    | 81    |
| #29 | (Pedicule Screws):ti,ab,kw                              | 447   |
| #30 | (Pedicule Screw):ti,ab,kw                               | 673   |
| #31 | (Instrument):ti,ab,kw                                   | 12984 |
| #32 | (Instrumentation):ti,ab,kw                              | 25557 |
| #33 | (Instrument*):ti,ab,kw                                  | 50552 |
| #34 | (Implant):ti,ab,kw                                      | 14605 |
| #35 | (Screw*):ti,ab,kw                                       | 4219  |
| #36 | (Screw-rod):ti,ab,kw                                    | 32    |
| #37 | (Rod):ti,ab,kw                                          | 735   |
| #38 | (Metalware):ti,ab,kw                                    | 6     |
| #39 | (Hardware):ti,ab,kw                                     | 731   |
| #40 | (Fixation):ti,ab,kw                                     | 10423 |

|     |                                                                                                   |       |
|-----|---------------------------------------------------------------------------------------------------|-------|
| #41 | (internal-fixation):ti,ab,kw                                                                      | 1943  |
| #42 | #28 or #29 or #30 or #31 or #32 or #33 or #34 or #35<br>or #36 or #37 or #38 or #39 or #40 or #41 | 74002 |
| #43 | (remov*):ti,ab,kw                                                                                 | 40984 |
| #44 | (remove):ti,ab,kw                                                                                 | 5020  |
| #45 | (removed):ti,ab,kw                                                                                | 14037 |
| #46 | (Removal):ti,ab,kw                                                                                | 22882 |
| #47 | #43 or #44 or #45 or #46                                                                          | 40984 |
| #48 | #27 and #42 and #47                                                                               | 50    |

## Web of Science

| Search number | Query                                        | Results |
|---------------|----------------------------------------------|---------|
| #1            | Spinal fracture (Topic)                      | 34362   |
| #2            | TS=(Spinal fractures)                        | 34362   |
| #3            | TS=(Spinal burst fracture)                   | 2131    |
| #4            | TS=(Spinal burst fractures)                  | 2131    |
| #5            | TS=(Thoracolumbar fracture)                  | 4493    |
| #6            | TS=(Thoracolumbar fractures)                 | 4493    |
| #7            | TS=(Thoracolumbar burst fractures)           | 1713    |
| #8            | TS=(Thoracolumbar burst fracture)            | 1713    |
| #9            | #1 OR #2 OR #3 OR #4 OR #5 OR #6 OR #7 OR #8 | 35147   |
| #10           | TS=(Lumbar vertebrae)                        | 67790   |
| #11           | TS=(Thoracic vertebrae)                      | 26769   |
| #12           | TS=(Lumbar)                                  | 177577  |
| #13           | TS=(Thoracic)                                | 266233  |
| #14           | TS=(Thoracolumbar)                           | 11969   |
| #15           | #10 OR #11 OR #12 OR #13 OR #14              | 424743  |
| #16           | TS=(Fracture)                                | 1015758 |
| #17           | TS=(Fractures)                               | 1015758 |
| #18           | TS=(Fracture*)                               | 994312  |
| #19           | TS=(Burst Fracture)                          | 5729    |
| #20           | TS=(Burst Fractures)                         | 5729    |
| #21           | TS=(Burst Fracture*)                         | 5619    |
| #22           | #16 OR #17 OR #18 OR #19 OR #20 OR #21       | 1015863 |
| #23           | #22 AND #15                                  | 29448   |
| #24           | #23 OR #9                                    | 50366   |
| #25           | TS=(Pedicle Screws)                          | 14126   |
| #26           | TS=(Instrument)                              | 1428193 |

|     |                                                                                               |          |
|-----|-----------------------------------------------------------------------------------------------|----------|
| #27 | TS=(Pedicule screw)                                                                           | 14126    |
| #28 | TS=(Instrumentation)                                                                          | 1709834  |
| #29 | TS=(Instrument*)                                                                              | 3038791  |
| #30 | TS=(Implant)                                                                                  | 627391   |
| #31 | TS=(Screw*)                                                                                   | 3191244  |
| #32 | TS=(Screw-rod)                                                                                | 777386   |
| #33 | TS=(Rod)                                                                                      | 7576243  |
| #34 | TS=(Metalware)                                                                                | 143      |
| #35 | TS=(Hardware)                                                                                 | 578388   |
| #36 | TS=(Fixation)                                                                                 | 497739   |
| #37 | TS=(internal-fixation)                                                                        | 24676    |
| #38 | #25 OR #26 OR #27 OR #28 OR #29 OR #30 OR<br>#31 OR #32 OR #33 OR #34 OR #35 OR #36 OR<br>#37 | 13487482 |
| #39 | TS=(remov*)                                                                                   | 4840514  |
| #40 | TS=(remove)                                                                                   | 3528113  |
| #41 | TS=(removed)                                                                                  | 3528113  |
| #42 | TS=(Removal)                                                                                  | 1641282  |
| #43 | #39 OR #40 OR #41 OR #42                                                                      | 4840514  |
| #44 | #43 AND #38 AND #24                                                                           | 1266     |

## Google Scholar

| Search number | Query                                                                                                                              | Results |
|---------------|------------------------------------------------------------------------------------------------------------------------------------|---------|
| #1            | ("Thoracolumbar burst fracture") AND ("Pedicule Screw" OR "Instrument" OR "Screw-rod" OR "Metalware") AND ("Removal" OR "Removed") | 1020    |
