# Supplementary material for: The Necessity of Implant Removal after Fixation of Thoracolumbar Burst Fractures—A Systematic Review
Source: MDPI journal article supplement (doi:10.3390/jcm12062213), 2023-03-13
Supplement: s1 [file s1]

**Table S2: Baseline characteristics of the included case reports and case series**

| First Author                         | Publication Year | Region      | Journal                                  | Type of Study | Study Dates             | No. of Patients | Age (year)   | Gender   | Fracture Level                | Approach               |
|--------------------------------------|------------------|-------------|------------------------------------------|---------------|-------------------------|-----------------|--------------|----------|-------------------------------|------------------------|
| Vanichkachorn et al. <sup>[30]</sup> | 1997             | USA         | Spine                                    | Case Report   | 1996                    | 1 case          | 40           | M        | L1                            | Posterior Open         |
| Waelchli et al. <sup>[31]</sup>      | 2002             | Switzerland | European Spine Journal                   | Case Report   | 2001                    | 2 case          | 53           | F        | L1                            | Posterior Open         |
|                                      |                  |             |                                          |               |                         |                 | 62           | F        | L2                            | Posterior Open         |
| Cappucciol <sup>[32]</sup>           | 2015             | Italy       | Journal of Orthopaedics and Traumatology | Case Report   | 2014                    | 1 case          | 29           | M        | L2                            | Posterior percutaneous |
| Takeda et al. <sup>[33]</sup>        | 2022             | Japan       | Surgical Neurology International         | Case Report   | 2022                    | 1 case          | 28           | M        | L1                            | Posterior Open         |
| Kim et al. <sup>[34]</sup>           | 2008             | South Korea | Journal of Korean Neurosurgical Society  | Case Series   | January 2003 ~ May 2005 | 14 cases        | 42 (22–67)   | 4F : 10M | Thoracolumbar fractures       | Posterior approach     |
| Wang et al. <sup>[35]</sup>          | 2008             | China       | Journal of Neurosurgery: Spine           | Case Series   | 1999~2003               | 27 cases        | 35.4 (19–57) | 8F : 19M | Thoracolumbar burst fractures | Posterior Open         |
| Toyone et al. <sup>[36]</sup>        | 2013             | Japan       | Spine                                    | Case Series   | 2000~2012               | 12 cases        | 38 (14–59)   | 3F : 9M  | Thoracolumbar burst fractures | Posterior approach     |
| Axelsson et al. <sup>[37]</sup>      | 2016             | Sweden      | Acta Orthopaedica                        | Case Series   | 2007~2011               | 7 cases         | 29.4 (19–48) | 4F : 3M  | Thoracolumbar fracture        | Posterior Open         |

Abbreviations: F, female; M, male.
